# Supplementary material for: A map of protein dynamics during cell-cycle progression and cell-cycle exit
Source: PubMed Central journal article supplement (PMC5608403; doi:10.1371/journal.pbio.2003268), 2017-09-11
Supplement: pbio.2003268.s001.pdf [file pbio.2003268.s001.pdf]

A.

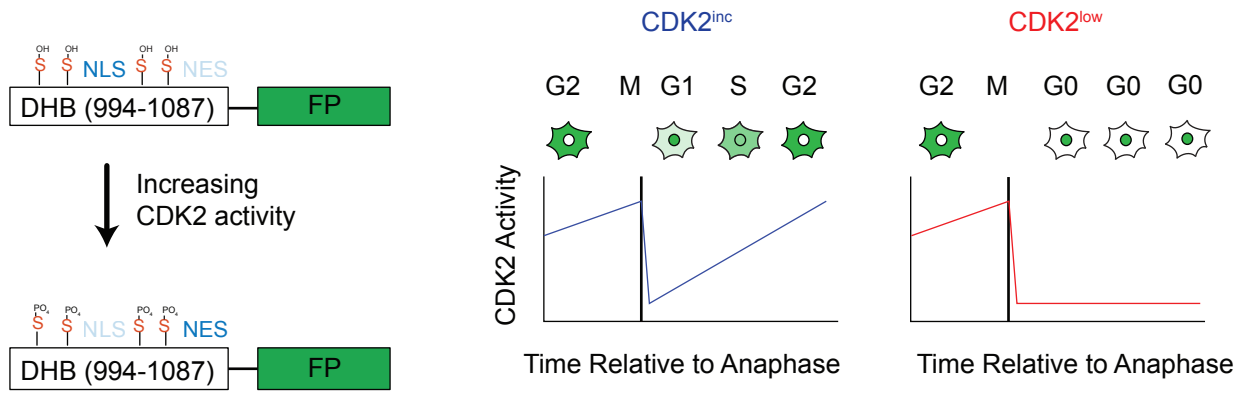

$$\text{CDK2 activity} = \frac{\text{Cytoplasmic signal}}{\text{Nuclear signal}}$$

B.

|         | DNA         | EdU                                    | pRb      | pHH3     |
|---------|-------------|----------------------------------------|----------|----------|
| G0-like | < 2N cutoff | < negative cutoff                      | < cutoff |          |
| G1      | < 2N cutoff | < negative cutoff                      | > cutoff |          |
| Early s | < 2N cutoff | > negative cutoff<br>< positive cutoff |          |          |
| S       |             | > positive cutoff                      |          |          |
| Late S  | > 4N cutoff | > negative cutoff<br>< positive cutoff |          |          |
| G2      | > 4N cutoff | < negative cutoff                      |          | < cutoff |
| M       |             |                                        |          | > cutoff |

C.

| Signal        | Dye     | Filter |
|---------------|---------|--------|
| DNA           | Hoechst | DAPI   |
| POI           | AF488   | FITC   |
| pRb /<br>pHH3 | AF546   | Cy3    |
| EdU           | AF647   | Cy5    |
