# Supplementary material for: A map of protein dynamics during cell-cycle progression and cell-cycle exit
Source: PubMed Central journal article supplement (PMC5608403; doi:10.1371/journal.pbio.2003268), 2017-09-11

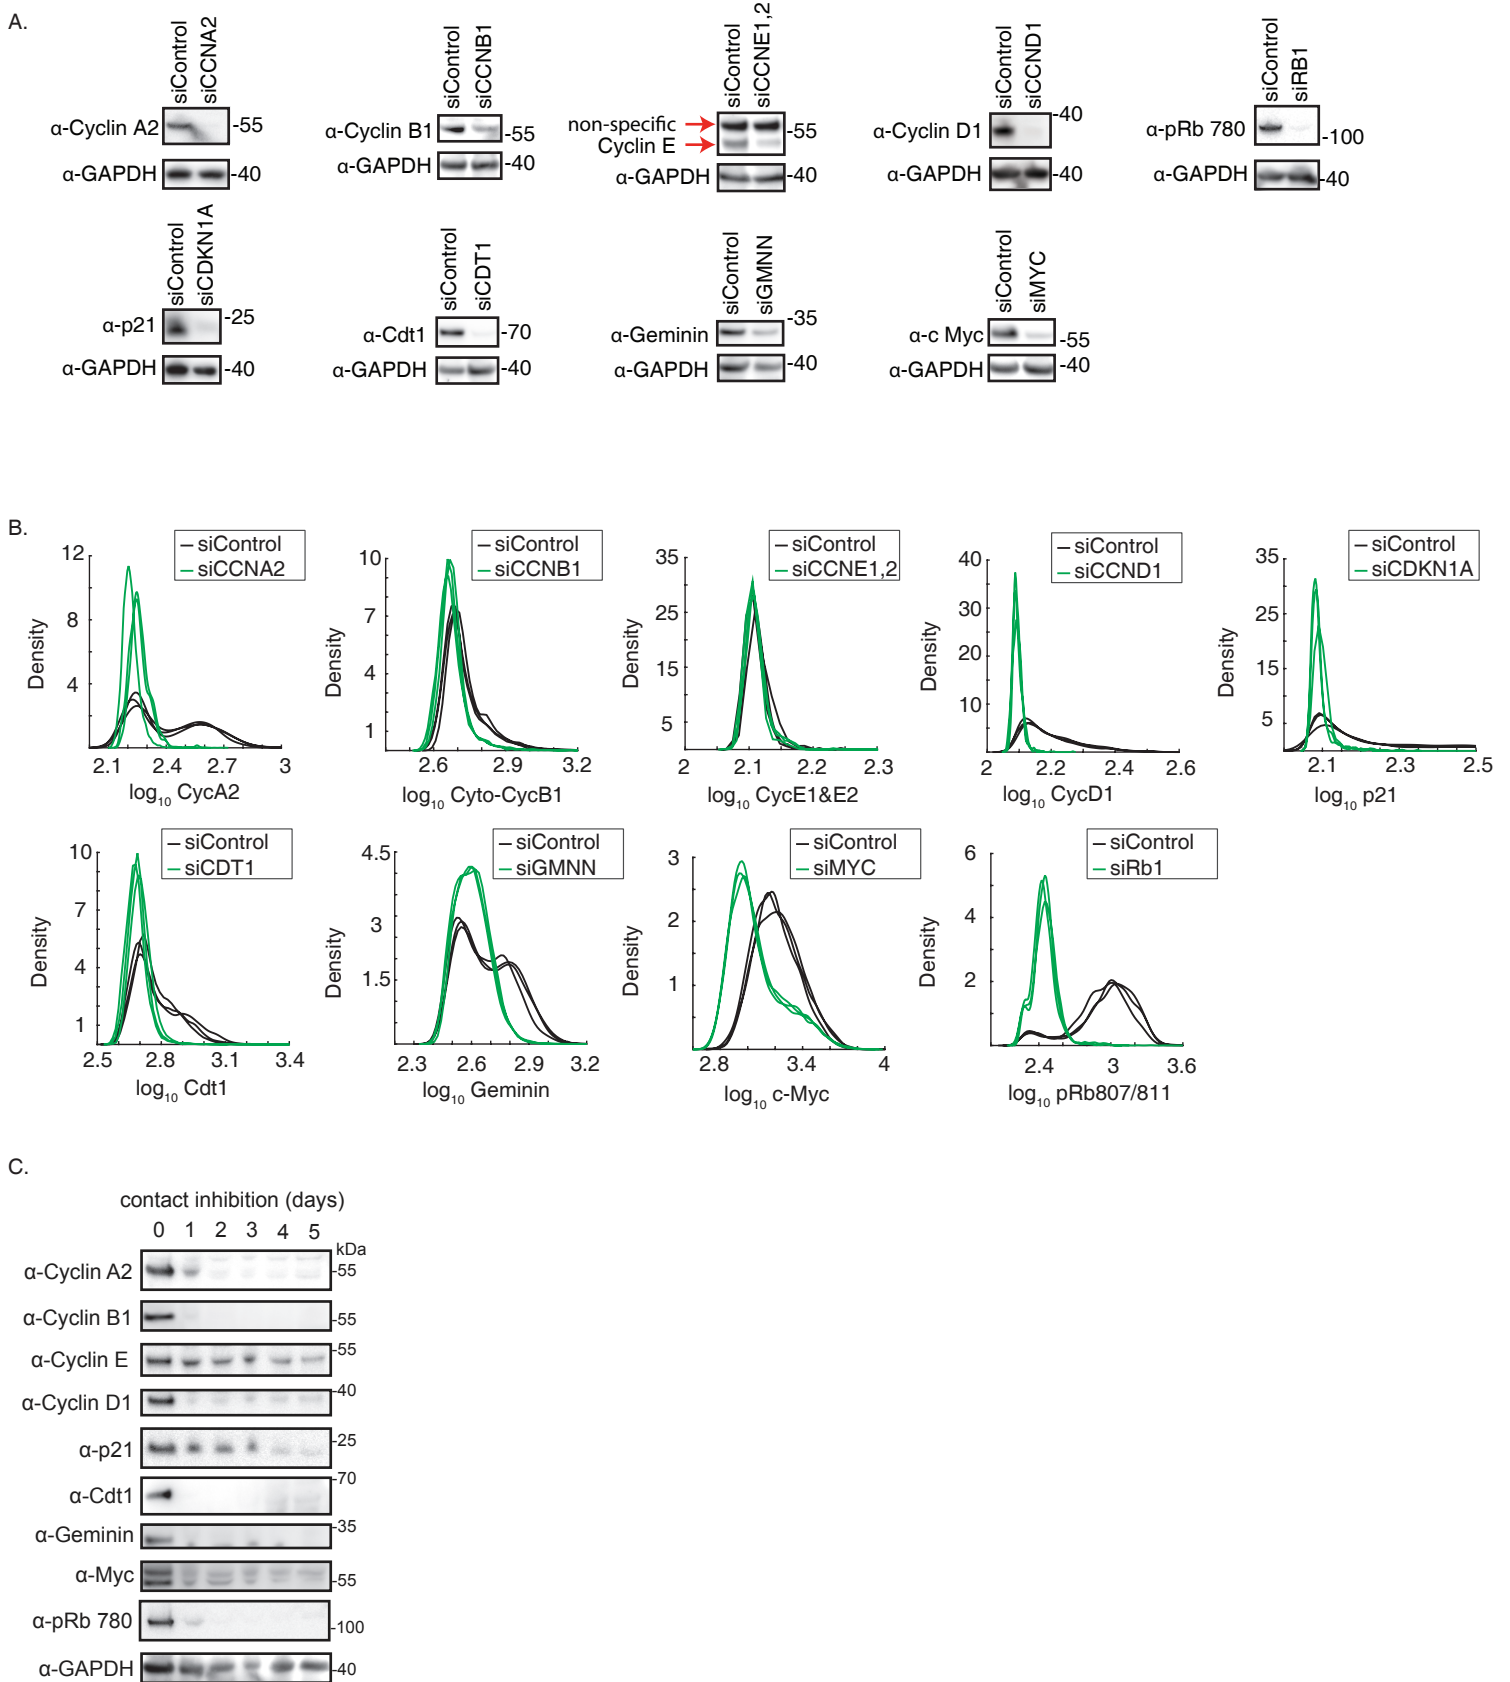

Supplement: pbio.2003268.s006.pdf [file pbio.2003268.s006.pdf]
